# Supplementary material for: Auto-Antibody Production During Experimental Atherosclerosis in ApoE-/- Mice
Source: Front Immunol. 2021 Jul 9;12:695220. doi: 10.3389/fimmu.2021.695220 (PMC8299997; doi:10.3389/fimmu.2021.695220)
Supplement: Supplementary file 1 [file DataSheet_1.xlsx]

## Sheet: DATA FILE S1
DATA FILE S1. Antigen targets found with ApoE-/- IgM (z-score > 3)
Protein name	Protein ID	Avg. z-score
TOM1	JHU05842.B6C12R4	23.6594
SH3GLB2	JHU01617.B13C15R82	21.048
RPSA	JHU02089.B14C5R14	20.4366
TOM1	JHU13577.B10C22R36	20.4155
FAM131C	JHU05680.B1C7R90	16.4642
SASS6	JHU15828.B9C17R68	16.2876
PVRL3_frag	JHU03238.B3C8R54	16.1385
GPBP1_frag	JHU02535.B4C6R38	15.9607
AAMP	JHU13499.B9C17R32	15.5087
RPSA	JHU15365.B12C14R62	15.3563
SRXN1	JHU14249.B12C5R48	15.3005
RPSA	JHU15365.B10C5R62	15.1272
TPM4	JHU02486.B14C27R12	15.1104
DAP	JHU09622.B13C24R8	14.9237
RPSA	JHU15455.B11C22R62	14.3574
ATIC	JHU14082.B10C28R40	12.558
RNF157	JHU17948.B14C29R66	12.1025
SLC7A6OS	JHU08138.B8C26R42	11.6704
MAPK1IP1L	JHU04809.B3C4R78	11.5511
CHRNA3	JHU13994.B10C25R42	11.3639
UBE2Q1	JHU25696.B18C24R2	11.3325
OTUD5	JHU15158.B10C19R60	10.6346
CETN2	JHU01939.B15C7R82	10.2655
CRACR2B	JHU05590.B1C6R86	10.2042
ACTN1	JHU08644.B5C1R46	9.6462
RPSA	JHU05929.B6C17R2	9.5244
LGALS13	JHU09651.B8C12R66	9.2779
BCAR1	JHU13987.B15C9R90	9.2602
KJ904364_frag	JHU04895.B4C11R74	9.1513
ACBD3	JHU10271.B7C18R72	8.7609
ANXA10	JHU04900.B12C29R90	8.681
GPR85	JHU12386.B10C27R14	8.584
RAD23A	JHU09187.B5C28R52	8.5735
RGS20	JHU07939.B5C1R32	8.3421
UBL7	JHU14164.B12C7R40	8.165
RASGRP3	JHU12324.B12C3R18	8.1067
TPM3	JHU01339.B16C10R80	8.0749
FAM131B	JHU05594.B4C1R90	7.9581
NAPB	JHU15920.B9C19R72	7.8552
RAD23A	JHU16026.B9C31R68	7.7954
ITCH	JHU14846.B9C30R50	7.4319
FAM131B	JHU12373.B10C8R16	7.4046
AKR7A2	JHU09221.B7C26R56	7.3656
SNX9	JHU14342.B11C14R44	7.329
ITGB1BP2	JHU10218.B5C19R72	7.2714
ATCAY	JHU08359.B7C31R38	7.1611
WARS	JHU14803.B14C2R80	7.1534
PRH1	JHU09767.B5C17R64	7.0705
APBA1	JHU18056.B15C31R62	7.0319
OXR1	JHU18389.B13C24R44	6.8822
MAGI1	JHU18003.B14C25R64	6.8289
DBNL	JHU08946.B5C22R50	6.7579
ACTN4	JHU07106.B15C20R86	6.7521
ERP27	JHU03011.B1C21R44	6.6893
CETN1	JHU03862.B1C3R62	6.6284
MCM6	JHU08598.B8C14R46	6.5844
HSPA2	JHU13150.B11C17R30	6.4175
ANAPC15	JHU03470.B1C15R56	6.1772
ANXA11	JHU04613.B1C12R76	6.1303
CALML3	JHU03087.B3C20R52	6.1125
CEP250	JHU02517.B11C20R86	6.0971
PRH1	JHU15163.B9C24R60	6.0503
POLR2H	JHU02560.B3C24R38	5.985
CAMKK2	JHU12742.B9C22R20	5.9474
SMAD4	JHU06509.B7C18R10	5.9069
TTN	JHU15762.B12C3R70	5.8466
TPM1	JHU14060.B12C25R42	5.8264
TNS1	JHU06229.B5C5R10	5.7932
IRF2BP2	JHU17814.B13C2R66	5.7051
CCDC97	JHU04911.B4C30R76	5.7033
PRRC2B	JHU03219.B1C14R54	5.6555
WIPF1	JHU25143.B13C30R90	5.6147
SS-A 60kD	Auto-antigen.B20C6R40	5.5041
USP13	JHU21064.B17C11R18	5.4435
AAMP	JHU16389.B10C12R80	5.4296
USP13	JHU22797.B17C26R24	5.3277
EEF2K	JHU06542.B8C26R18	5.3251
TPM2	JHU06700.B5C22R16	5.3179
FSIP1	JHU07906.B5C6R46	5.3072
COMP	JHU18445.B15C13R44	5.2904
CPEB3	JHU12849.B13C23R74	5.2815
CCDC155	JHU09052.B5C16R52	5.273
PCMTD1	JHU09086.B5C6R52	5.1914
Q5xjv5	JHU19920.B16C26R10	5.1863
THEM5	JHU10553.B5C22R78	5.105
TP53	JHU13973.B10C27R40	5.1038
PPP4R3A	JHU16132.B9C15R76	5.0727
ANXA8	JHU15097.B11C24R58	5.0686
SF3B4	JHU09195.B6C7R50	5.0464
SDCCAG3	JHU23334.B14C25R86	5.0074
GCSH	JHU19099.B16C27R24	4.9683
RABEP2	JHU06787.B8C24R14	4.9583
EPN1	JHU12367.B12C8R18	4.9217
PTPN12	JHU10628.B8C19R74	4.9053
GSS	JHU02052.B1C29R34	4.8996
NDRG2	JHU20304.B20C10R12	4.8635
PNMA1	JHU05920.B8C27R4	4.8071
SPATA20	JHU16376.B9C21R74	4.7599
PNMA2	JHU09951.B6C13R66	4.7561
DBNL	JHU05495.B4C9R88	4.7023
HCLS1	JHU14116.B12C18R42	4.6698
EIF4B	JHU15211.B10C13R56	4.6646
FAF1	JHU02528.B4C6R40	4.636
CRNN	JHU13904.B12C8R42	4.6113
CCDC6	JHU16261.B13C27R76	4.6105
FAM131B	JHU16409.B12C12R84	4.5954
PPIH	JHU00448.B20C11R16	4.583
LBHD1	JHU09320.B7C8R60	4.5694
CIAPIN1	JHU04914.B2C7R74	4.4802
SHQ1	JHU07175.B15C30R68	4.4566
FAM131C	JHU00996.B3C6R18	4.4229
SPATA32	JHU08266.B7C19R42	4.4066
NUDT1	JHU09465.B6C16R60	4.3869
RILPL1	JHU15985.B9C30R72	4.369
GSN	JHU11646.B10C14R2	4.3493
TRIM28	JHU08723.B8C11R46	4.3219
NSFL1C	JHU09275.B7C5R60	4.3048
CYB5R3	JHU03006.B1C30R48	4.2542
EXOSC7	JHU10495.B8C29R76	4.2433
KIAA0907	JHU11460.B5C7R86	4.224
PTGS2	Auto-antigen.B20C24R38	4.2203
PRB1	JHU19422.B16C20R26	4.2006
MAGEA11	JHU02306.B2C3R42	4.1997
PACSIN1	JHU09374.B8C29R60	4.1981
ARNT	JHU12000.B16C17R76	4.1429
IMPDH2	JHU09448.B6C16R56	4.1415
STUB1	JHU14160.B9C7R40	4.1404
NCCRP1	JHU11375.B6C24R88	4.1202
CALCOCO1	JHU02514.B1C24R38	4.1156
XPNPEP1	JHU24040.B18C25R18	4.1034
CCDC40	JHU10191.B5C24R70	4.0868
PAIP1	JHU11384.B7C1R88	4.0866
DPH2	JHU02524.B1C25R38	4.0852
CAPS	JHU11529.B12C20R2	4.0803
TSNAXIP1	JHU30288.B17C13R34	4.068
THOP1	JHU12713.B15C21R8	4.0204
PDE6D	JHU14136.B10C31R38	3.9956
BNIP2	JHU00396.B3C5R8	3.9955
ECHDC1	JHU25034.B14C21R90	3.991
HGS	JHU08677.B6C1R46	3.9447
ECHDC1	JHU25034.B14C13R90	3.9426
OPLAH	JHU18792.B15C31R50	3.8987
SHCBP1	JHU04112.B2C16R66	3.8489
BLMH	JHU07403.B13C8R82	3.8388
NAP1L1	JHU06475.B6C30R10	3.8369
APBB1	JHU09027.B7C19R54	3.8027
SHMT1	JHU05535.B3C9R90	3.7632
DIXDC1	JHU06740.B5C6R14	3.7339
SHD	JHU02186.B4C4R32	3.7278
SCML1	JHU03143.B4C12R52	3.7251
SPRR3	JHU14973.B9C12R58	3.7192
BLVRB	JHU10852.B7C8R82	3.7103
ZSCAN2	JHU14510.B9C31R46	3.707
CRYBA1	JHU10484.B8C14R78	3.7055
KLHL14	JHU15051.B9C29R60	3.6939
ANXA8	JHU02308.B1C2R42	3.6896
SLC4A1	JHU15940.B9C24R72	3.6851
SCYL3	JHU05159.B13C2R84	3.6811
ARMC6	JHU11424.B6C13R86	3.6744
MYLK	JHU14956.B9C15R58	3.6727
TRIP10	JHU07480.B15C23R88	3.6697
VCP	JHU15087.B9C32R60	3.6617
ARFGAP1	JHU05382.B3C23R90	3.6513
NEDD4L	JHU13360.B12C21R28	3.6416
GPHN	JHU18270.B16C17R44	3.6252
HSPA2	JHU09160.B6C28R54	3.623
SERPINB2	JHU13968.B11C22R40	3.6229
TTC32	JHU10819.B7C20R80	3.6181
CAMKK2	JHU09901.B8C21R64	3.6122
AIM1L	JHU30312.B18C30R36	3.5925
CRK	JHU08564.B7C17R44	3.5863
C4orf19	JHU05577.B4C24R86	3.5489
PARP1	JHU18304.B14C14R46	3.5391
SSBP4	JHU06511.B5C30R10	3.5369
UBXN1	JHU00436.B13C16R78	3.5049
SMAD1	JHU04684.B1C3R74	3.5011
CRYBB1	JHU18664.B16C24R52	3.5008
NOL3	JHU09079.B5C16R50	3.4899
PAFAH1B3	JHU04573.B12C22R88	3.4868
PAIP1	JHU02075.B3C8R34	3.4827
MAGEC2	JHU06193.B7C2R10	3.4597
CSTF2	JHU08084.B5C26R42	3.4393
CPEB3	JHU23980.B20C21R18	3.4181
UBXN1	JHU00329.B13C6R78	3.4088
PLEKHA4	JHU16370.B10C7R74	3.3935
SSBP2	JHU01049.B1C24R16	3.3765
CCDC89	JHU05581.B4C4R90	3.3433
MTUS1	JHU03604.B4C27R60	3.3423
NEDD9	JHU10419.B7C12R76	3.3339
HEPHL1	JHU19294.B14C31R20	3.3284
UBE2B	JHU09210.B7C18R52	3.2949
SDCCAG3	JHU04772.B4C14R74	3.2924
TLK1	JHU17279.B13C6R48	3.2838
TUT1	JHU19807.B15C13R6	3.2628
CABP4	JHU08653.B5C11R46	3.2469
KIZ	JHU16162.B11C27R74	3.2437
RUNX1T1	JHU02848.B3C27R44	3.2368
RAD23B	JHU04765.B4C17R76	3.2327
VCL	JHU18520.B14C30R46	3.2285
PGM2	JHU14325.B9C17R44	3.2054
OGT	JHU11038.B7C11R82	3.2037
DYDC2	JHU14105.B10C30R40	3.1873
SCOC	JHU10437.B6C5R74	3.1621
MTCP1	JHU14572.B12C26R50	3.1558
KHDRBS3	JHU16295.B16C20R74	3.1546
SH3D19	JHU16130.B10C2R74	3.1434
ESD	JHU14828.B11C28R54	3.1374
COL4A3BP	JHU00022.B1C26R2	3.1337
ZNF768	JHU16807.B14C16R42	3.1334
SUPT5H	JHU19861.B17C16R14	3.1279
ANXA2	JHU13600.B12C25R36	3.1227
PCED1A	JHU08858.B5C26R52	3.1184
CAMKK1	JHU07694.B6C12R32	3.1133
ZSCAN20	JHU09119.B5C24R52	3.1089
LASP1	JHU14849.B10C30R54	3.1029
CPTP_frag	JHU02353.B2C12R42	3.0806
SPEG	JHU11904.B11C2R8	3.0702
PDE9A	JHU04665.B1C20R76	3.0239
GRHPR	JHU04353.B16C1R12	3.0228
E2F2	JHU07129.B7C1R22	3.0184
NUDT3	JHU14134.B12C13R40	3.0177

## Sheet: DATA FILE S2
DATA FILE S2. Antigen targets found with C57BL/6J IgM (z-score > 3)
Protein name	Protein ID	Avg. z-score
OTUD5	JHU15158.B10C19R60	45.72
SASS6	JHU15828.B9C17R68	43.91
KJ904364_frag	JHU04895.B4C11R74	37.01
TOM1	JHU05842.B6C12R4	30.03
TOM1	JHU13577.B10C22R36	28.12
RNF157	JHU17948.B14C29R66	26.71
RASGRP3	JHU12324.B12C3R18	23.02
PGK2	JHU19504.B13C32R30	16.03
ATIC	JHU14082.B10C28R40	15.81
NDRG2	JHU20304.B20C10R12	15.01
CRACR2B	JHU05590.B1C6R86	14.73
PDZD3	JHU03043.B2C7R48	13.82
LGALS13	JHU09651.B8C12R66	10.99
DAP	JHU09622.B13C24R8	10.65
UBE2Q1	JHU25696.B18C24R2	10.28
ARAP1	JHU11727.B9C19R4	9.86
SPR	JHU08814.B7C13R48	9.58
OPLAH	JHU18792.B15C31R50	9.46
FAM131B	JHU12373.B10C8R16	9.18
GPR85	JHU12386.B10C27R14	9.17
MCM6	JHU08598.B8C14R46	9.15
YBX2	JHU13013.B9C31R24	8.94
CAPS	JHU11529.B12C20R2	8.54
CSNK2A1	JHU05391.B1C12R90	8.2
SF3B4	JHU09195.B6C7R50	7.97
SRI	JHU00282.B4C19R6	7.56
SRXN1	JHU14249.B12C5R48	7.41
ARMC6	JHU11424.B6C13R86	7.14
FRK	JHU14645.B9C22R52	7.13
ARNT	JHU12000.B16C17R76	7.11
FAM131B	JHU05594.B4C1R90	7.1
FAM131B	JHU16409.B12C12R84	7.09
SS-A 60kD	Auto-antigen.B20C6R40	7.06
GALE	JHU08583.B6C17R44	7.04
CEP250	JHU02517.B11C20R86	7.03
RAG1	JHU12322.B12C23R18	7.02
ZNF701	JHU16803.B15C4R42	6.96
RPSA	JHU02089.B14C5R14	6.93
R3HDM2_frag	JHU15555.B10C4R62	6.91
R3HDM2_frag	JHU11011.B6C11R84	6.57
ISOC2	JHU05040.B1C15R82	6.24
ZYX	JHU08351.B8C25R40	6.22
SPATA20	JHU16376.B9C21R74	6.18
ACAP1	JHU14632.B11C8R50	6.01
CEP120	JHU05580.B13C11R70	5.82
ERP27	JHU03011.B1C21R44	5.81
PIK3R6	JHU17942.B13C14R66	5.77
RAD23A	JHU09187.B5C28R52	5.71
PTPN23	JHU19428.B13C12R28	5.65
RPSA	JHU15365.B12C14R62	5.58
RTCA	JHU13663.B9C25R36	5.4
CELF4	JHU12549.B10C18R16	5.27
CLC	JHU18987.B16C12R24	5.19
NAPB	JHU15920.B9C19R72	5.18
OCRL	JHU16017.B11C28R70	5.13
ATP5B	JHU07875.B8C1R36	5.07
CDKN2AIP	JHU05301.B4C31R84	5.05
YBX2	JHU14259.B11C2R48	4.93
SHMT1	JHU05535.B3C9R90	4.9
ARNT	JHU12000.B9C29R8	4.82
PDE1B	JHU18211.B14C5R48	4.73
ANXA10	JHU04900.B12C29R90	4.66
SFN	JHU05260.B1C25R82	4.53
TLE3	JHU12337.B11C26R18	4.53
FBXO2	JHU08293.B5C1R40	4.45
ZNF436-AS1	JHU14527.B10C5R50	4.45
WIPF1	JHU25143.B13C30R90	4.43
ANXA6	JHU03948.B10C5R88	4.36
CLIC2	JHU00208.B1C4R6	4.36
SCNN1D	JHU15748.B10C3R70	4.34
SNAP91	JHU07181.B13C14R80	4.23
PHOSPHO1	JHU19414.B14C3R28	4.19
DNAJC11	JHU07801.B8C22R34	4.19
Q5xjv5	JHU19920.B16C26R10	4.13
GNAS	JHU28981.B17C22R6	4.13
ZNF701	JHU16803.B14C27R76	4.1
ZNF207	JHU12824.B12C22R24	3.97
RILPL1	JHU15985.B9C30R72	3.94
GPBP1_frag	JHU02535.B4C6R38	3.87
SMAD4	JHU06509.B7C18R10	3.84
HOOK2	JHU18278.B16C8R44	3.84
ARV1	JHU03267.B1C25R54	3.79
RPSA	JHU15455.B11C22R62	3.79
RAD23A	JHU16026.B9C31R68	3.75
WBP11	JHU02590.B13C2R14	3.75
CCDC89	JHU05581.B4C4R90	3.73
TP53TG5	JHU08076.B6C26R38	3.71
AK7	JHU07490.B5C25R28	3.64
ITCH	JHU14846.B9C30R50	3.64
GORASP2	JHU04352.B2C17R70	3.63
PLD3	JHU07931.B8C6R36	3.57
RPA3	JHU13284.B11C11R30	3.47
CERS6	JHU29293.B17C29R20	3.42
ALDH1L1	JHU25146.B13C7R86	3.41
RPSA	JHU15365.B10C5R62	3.4
UBQLN2	JHU09588.B5C21R56	3.36
TP53I3	JHU04981.B18C31R10	3.35
SNRPA	JHU02190.B3C4R32	3.31
NUDT1	JHU09465.B6C16R60	3.29
USP13	JHU21064.B17C11R18	3.28
LMNA	JHU08879.B13C26R74	3.28
AKR7A2	JHU09221.B7C26R56	3.27
COL5A2	JHU15971.B9C13R72	3.25
RSG1	JHU02795.B4C8R44	3.25
EPN1	JHU12367.B12C8R18	3.22
RPSA	JHU05929.B6C17R2	3.22
HEBP2	JHU07435.B15C3R88	3.21
CCDC57	JHU07501.B6C19R30	3.21
TCL1A	JHU04883.B15C16R8	3.2
Zic1	JHU19606.B15C2R2	3.19
EYA1	JHU29865.B18C13R28	3.17
FAM84B	JHU27153.B17C5R10	3.14
ATF7IP2	JHU16486.B11C14R80	3.13
NUDT3	JHU14134.B12C13R40	3.12
MISP	JHU07495.B6C1R30	3.11
UNC5CL	JHU09212.B6C31R54	3.08
SART3	JHU06610.B7C20R16	3.06
PPCS	JHU30058.B18C17R34	3.02
IMPDH1	JHU09734.B8C29R64	3.01

## Sheet: DATA FILE S3
DATA FILE S3. Antigen targets found with ApoE-/- IgG (z-score > 3)
Protein name	Protein ID	Avg. z-score
SH3GLB2	JHU01617.B13C15R82	22.8284
GPBP1_frag	JHU02535.B4C6R38	18.7432
RPSA	JHU02089.B14C5R14	17.7711
TOM1	JHU05842.B6C12R4	17.096
SRXN1	JHU14249.B12C5R48	16.1651
PVRL3_frag	JHU03238.B3C8R54	15.9147
TOM1	JHU13577.B10C22R36	15.1925
RPSA	JHU15365.B12C14R62	15.1084
FAM131C	JHU05680.B1C7R90	13.7549
RPSA	JHU15455.B11C22R62	13.7388
SASS6	JHU15828.B9C17R68	13.5315
SLC7A6OS	JHU08138.B8C26R42	13.1696
AAMP	JHU13499.B9C17R32	13.0282
DAP	JHU09622.B13C24R8	12.9926
TPM4	JHU02486.B14C27R12	12.9184
RPSA	JHU15365.B10C5R62	12.8422
ATIC	JHU14082.B10C28R40	12.0024
KJ904364_frag	JHU04895.B4C11R74	10.6144
RNF157	JHU17948.B14C29R66	10.1924
MAPK1IP1L	JHU04809.B3C4R78	10.0314
UBL7	JHU14164.B12C7R40	9.775
UBE2Q1	JHU25696.B18C24R2	9.6486
CHRNA3	JHU13994.B10C25R42	9.6384
EEF2K	JHU06542.B8C26R18	9.4257
LGALS13	JHU09651.B8C12R66	9.1232
ANXA10	JHU04900.B12C29R90	9.113
OTUD5	JHU15158.B10C19R60	9.033
ACBD3	JHU10271.B7C18R72	8.8954
FAM131B	JHU05594.B4C1R90	8.6108
RPSA	JHU05929.B6C17R2	8.4789
CETN2	JHU01939.B15C7R82	8.4772
CCDC97	JHU04911.B4C30R76	8.4764
RAD23A	JHU09187.B5C28R52	8.4214
ATCAY	JHU08359.B7C31R38	8.3335
PAIP1	JHU11384.B7C1R88	8.2839
PAIP1	JHU02075.B3C8R34	8.1911
NCCRP1	JHU11375.B6C24R88	8.1511
GPR85	JHU12386.B10C27R14	7.9814
NDRG2	JHU20304.B20C10R12	7.7439
CRACR2B	JHU05590.B1C6R86	7.6758
NAPB	JHU15920.B9C19R72	7.6213
APBA1	JHU18056.B15C31R62	7.4673
BCAR1	JHU13987.B15C9R90	7.391
THOP1	JHU12713.B15C21R8	7.3098
ITCH	JHU14846.B9C30R50	7.2875
FAM131B	JHU12373.B10C8R16	7.2578
TPM3	JHU01339.B16C10R80	7.2264
RAD23A	JHU16026.B9C31R68	7.1949
SMAD4	JHU06509.B7C18R10	7.146
RASGRP3	JHU12324.B12C3R18	7.0076
MCM6	JHU08598.B8C14R46	6.6603
RABEP2	JHU06787.B8C24R14	6.5582
HSPA2	JHU13150.B11C17R30	6.4315
TPM1	JHU14060.B12C25R42	6.4212
AKR7A2	JHU09221.B7C26R56	6.3928
CAMKK2	JHU12742.B9C22R20	6.3603
CRK	JHU08564.B7C17R44	6.3548
OXR1	JHU18389.B13C24R44	6.3123
ERP27	JHU03011.B1C21R44	6.2881
PNMA1	JHU05920.B8C27R4	6.2643
ACTN1	JHU08644.B5C1R46	6.2482
AKT1	JHU25302.B17C4R18	6.1658
TRIP10	JHU07480.B15C23R88	6.1465
RGS20	JHU07939.B5C1R32	6.146
ITGB1BP2	JHU10218.B5C19R72	6.0989
SNX9	JHU14342.B11C14R44	5.9049
AKT2	JHU19451.B14C9R26	5.9043
CEP250	JHU02517.B11C20R86	5.8324
DBNL	JHU08946.B5C22R50	5.8266
CIAPIN1	JHU04914.B2C7R74	5.7943
POLR2H	JHU02560.B3C24R38	5.7837
PTPN12	JHU10628.B8C19R74	5.7819
SCML1	JHU03143.B4C12R52	5.7179
NEDD4L	JHU13360.B12C21R28	5.6057
ACTN4	JHU07106.B15C20R86	5.5733
MAGI1	JHU18003.B14C25R64	5.5538
AAMP	JHU16389.B10C12R80	5.4479
ANAPC15	JHU03470.B1C15R56	5.4257
PRRC2B	JHU03219.B1C14R54	5.399
FAF1	JHU02528.B4C6R40	5.3329
EXOSC7	JHU10495.B8C29R76	5.2124
SPATA20	JHU16376.B9C21R74	5.204
GCSH	JHU19099.B16C27R24	5.1809
IRF2BP2	JHU17814.B13C2R66	5.081
ARNT	JHU12000.B16C17R76	5.0687
PACSIN1	JHU09374.B8C29R60	5.0254
FCHSD2	JHU14739.B12C25R54	5.0004
SDCCAG3	JHU23334.B14C25R86	4.9963
TTN	JHU15762.B12C3R70	4.9797
ANXA8	JHU15097.B11C24R58	4.9735
PPP4R3A	JHU16132.B9C15R76	4.9622
CETN1	JHU03862.B1C3R62	4.9081
FAM131C	JHU00996.B3C6R18	4.8895
HCLS1	JHU14116.B12C18R42	4.7821
FAM131B	JHU16409.B12C12R84	4.748
CCDC6	JHU16261.B13C27R76	4.7213
DBNL	JHU05495.B4C9R88	4.7005
APBB1	JHU09027.B7C19R54	4.6558
CAPS	JHU11529.B12C20R2	4.6148
CRKL	JHU05873.B7C32R2	4.6092
BNIP2	JHU00396.B3C5R8	4.6055
EIF4A2	JHU05113.B3C8R84	4.5848
EPN1	JHU12367.B12C8R18	4.5389
MAGEC2	JHU06193.B7C2R10	4.5221
CRNN	JHU13904.B12C8R42	4.5075
MTURN	JHU24542.B19C6R6	4.4884
SHD	JHU02186.B4C4R32	4.4766
CALML3	JHU03087.B3C20R52	4.4463
SF3B4	JHU09195.B6C7R50	4.4401
CAMKK2	JHU09901.B8C21R64	4.4368
MAGEA11	JHU02306.B2C3R42	4.4199
LBHD1	JHU09320.B7C8R60	4.4046
TRIM28	JHU08723.B8C11R46	4.3632
MTUS1	JHU03604.B4C27R60	4.3566
WARS	JHU14803.B14C2R80	4.331
USP13	JHU22797.B17C26R24	4.2708
ANXA11	JHU04613.B1C12R76	4.2634
NSFL1C	JHU09275.B7C5R60	4.2597
PTGS2	Auto-antigen.B20C24R38	4.2419
TPM2	JHU06700.B5C22R16	4.2019
TLK1	JHU17279.B13C6R48	4.1421
PDIA2	JHU18017.B15C24R62	4.1162
TNS1	JHU06229.B5C5R10	4.1087
THEM5	JHU10553.B5C22R78	4.0989
USP13	JHU21064.B17C11R18	4.0895
COMP	JHU18445.B15C13R44	4.0869
SSBP4	JHU06511.B5C30R10	4.0849
WIPF1	JHU25143.B13C30R90	4.0737
DPH2	JHU02524.B1C25R38	4.0645
PPIA	JHU02083.B14C22R8	4.0625
CRYBA1	JHU10484.B8C14R78	4.0513
N4BP1	JHU17835.B14C20R66	4.009
NEDD9	JHU10419.B7C12R76	4.0039
SDCCAG3	JHU04772.B4C14R74	4.001
GSN	JHU11646.B10C14R2	3.9808
CRYBB1	JHU18664.B16C24R52	3.9688
RAD23B	JHU04765.B4C17R76	3.9353
NUDT1	JHU09465.B6C16R60	3.9269
SHMT1	JHU05535.B3C9R90	3.8897
KHDRBS3	JHU16295.B16C20R74	3.8533
VCP	JHU15087.B9C32R60	3.819
TP53I3	JHU04981.B18C31R10	3.7988
EIF4B	JHU15211.B10C13R56	3.7987
TUT1	JHU19807.B15C13R6	3.7925
ECHDC1	JHU25034.B14C13R90	3.79
TP53	JHU13973.B10C27R40	3.7875
NPIPA8	JHU12401.B13C4R18	3.7541
ECHDC1	JHU25034.B14C21R90	3.753
SERPINB2	JHU13968.B11C22R40	3.7376
FSIP1	JHU07906.B5C6R46	3.7373
EIF4A2	JHU05496.B2C14R86	3.7356
XPNPEP1	JHU24040.B18C25R18	3.7276
CALCOCO1	JHU02514.B1C24R38	3.7196
SCYL3	JHU05159.B13C2R84	3.7187
OPLAH	JHU18792.B15C31R50	3.7116
STUB1	JHU14160.B9C7R40	3.7064
KIZ	JHU16162.B11C27R74	3.7059
IGBP1	JHU02736.B4C15R46	3.6006
DIXDC1	JHU06740.B5C6R14	3.5951
ARFGAP1	JHU05382.B3C23R90	3.5547
SPEG	JHU11904.B11C2R8	3.5338
SPATA32	JHU08266.B7C19R42	3.5328
C4orf19	JHU05577.B4C24R86	3.527
SHQ1	JHU07175.B15C30R68	3.5125
ANXA8	JHU02308.B1C2R42	3.5046
GOPC	JHU09261.B7C23R56	3.5002
NUDT3	JHU14134.B12C13R40	3.4999
TTC32	JHU10819.B7C20R80	3.4794
NAP1L1	JHU06475.B6C30R10	3.4681
CCDC89	JHU05581.B4C4R90	3.4681
UBE2B	JHU09210.B7C18R52	3.4488
CCDC40	JHU10191.B5C24R70	3.448
GGA2	JHU09155.B5C21R54	3.4379
PNMA2	JHU09951.B6C13R66	3.4337
ZSCAN2	JHU14510.B9C31R46	3.4241
SPR	JHU08814.B7C13R48	3.3951
COL4A3BP	JHU00022.B1C26R2	3.3904
GPHN	JHU18270.B16C17R44	3.382
RPSA	JHU13454.B12C12R36	3.3623
RILPL1	JHU15985.B9C30R72	3.3591
HSPA2	JHU09160.B6C28R54	3.3241
BLVRB	JHU10852.B7C8R82	3.3205
CHEK2	JHU04053.B2C24R62	3.3199
MAGEA8	JHU02742.B3C20R46	3.316
PAFAH1B3	JHU04573.B12C22R88	3.314
GGA3	JHU16186.B14C14R78	3.3013
GSN	JHU12662.B12C12R24	3.2529
TNIK_frag	JHU07189.B5C24R22	3.2512
MBP	JHU16309.B12C25R78	3.2399
IMPDH2	JHU09448.B6C16R56	3.2395
SMAD1	JHU04684.B1C3R74	3.2242
GRHPR	JHU04353.B16C1R12	3.204
PDCD6IP	JHU29441.B20C31R20	3.1955
GAB1	JHU14747.B11C25R54	3.1706
RUNX1T1	JHU02848.B3C27R44	3.1669
ANXA2	JHU13600.B12C25R36	3.1504
CPEB3	JHU12849.B13C23R74	3.1376
PRH1	JHU09767.B5C17R64	3.1112
ADH5	JHU04710.B12C14R90	3.1079
PLEKHA4	JHU16370.B10C7R74	3.1062
ATF6	JHU03751.B1C7R58	3.1
SSBP2	JHU01049.B1C24R16	3.0946
AKR1A1	JHU04897.B16C20R86	3.0837
TSR2	JHU01530.B4C21R20	3.0755
UBXN1	JHU00436.B13C16R78	3.0644
UBE2O	JHU07002.B7C2R22	3.0637
SSBP3	JHU09872.B6C6R62	3.0555
SCOC	JHU10437.B6C5R74	3.0401
PPIH	JHU00448.B20C11R16	3.0315
SHCBP1	JHU04112.B2C16R66	3.0284
CPTP_frag	JHU02353.B2C12R42	3.0137
AIM1L	JHU30312.B18C30R36	3.0028

## Sheet: DATA FILE S4
DATA FILE S4. Antigen targets found with C57BL/6J IgG (z-score > 3)
Protein name	Protein ID	Avg. z-score
SASS6	JHU15828.B9C17R68	41.2114
OTUD5	JHU15158.B10C19R60	37.6996
KJ904364_frag	JHU04895.B4C11R74	32.4248
RNF157	JHU17948.B14C29R66	23.53
TOM1	JHU05842.B6C12R4	21.6387
TOM1	JHU13577.B10C22R36	20.5518
RASGRP3	JHU12324.B12C3R18	19.4931
NDRG2	JHU20304.B20C10R12	17.9765
ATIC	JHU14082.B10C28R40	13.1086
PGK2	JHU19504.B13C32R30	13.0021
PDZD3	JHU03043.B2C7R48	12.7374
CRACR2B	JHU05590.B1C6R86	12.3429
LGALS13	JHU09651.B8C12R66	12.2132
OPLAH	JHU18792.B15C31R50	11.2364
TMEM116	JHU01814.B3C16R26	11.1152
ARAP1	JHU11727.B9C19R4	10.7237
UBE2Q1	JHU25696.B18C24R2	10.3954
ARNT	JHU12000.B16C17R76	9.6668
SPR	JHU08814.B7C13R48	9.457
GNAS	JHU28981.B17C22R6	9.2589
DAP	JHU09622.B13C24R8	8.772
PIK3R6	JHU17942.B13C14R66	8.7543
GPR85	JHU12386.B10C27R14	8.5376
ERP27	JHU03011.B1C21R44	8.4618
YBX2	JHU13013.B9C31R24	8.3457
CAPS	JHU11529.B12C20R2	8.2605
FAM131B	JHU12373.B10C8R16	8.2396
SS-A 60kD	Auto-antigen.B20C6R40	8.1109
ZYX	JHU08351.B8C25R40	7.7192
CEP250	JHU02517.B11C20R86	7.6623
ZNF436-AS1	JHU14527.B10C5R50	7.6017
CSNK2A1	JHU05391.B1C12R90	7.4569
FAM131B	JHU16409.B12C12R84	7.3519
FRK	JHU14645.B9C22R52	7.3241
R3HDM2_frag	JHU15555.B10C4R62	7.2746
MCM6	JHU08598.B8C14R46	7.1578
FAM131B	JHU05594.B4C1R90	7.0314
SRXN1	JHU14249.B12C5R48	7.0115
SF3B4	JHU09195.B6C7R50	6.9604
RPSA	JHU02089.B14C5R14	6.6909
R3HDM2_frag	JHU11011.B6C11R84	6.494
RAG1	JHU12322.B12C23R18	6.4561
CEP120	JHU05580.B13C11R70	6.3433
CDKN2AIP	JHU05301.B4C31R84	6.3232
RPSA	JHU15365.B12C14R62	6.2896
ZNF701	JHU16803.B15C4R42	6.2224
WIPF1	JHU25143.B13C30R90	6.181
GALE	JHU08583.B6C17R44	6.1533
ACAP1	JHU14632.B11C8R50	6.1038
SRI	JHU00282.B4C19R6	6.0045
ARMC6	JHU11424.B6C13R86	5.8917
CELF4	JHU12549.B10C18R16	5.8457
SHMT1	JHU05535.B3C9R90	5.625
KCNA3	JHU15418.B14C5R76	5.4938
SPATA20	JHU16376.B9C21R74	5.4907
ARNT	JHU12000.B9C29R8	5.4423
NAPB	JHU15920.B9C19R72	5.2746
HDGFL1	JHU10686.B7C30R76	5.2701
DNAJC11	JHU07801.B8C22R34	5.1634
RTCA	JHU13663.B9C25R36	5.1376
YARS	JHU18237.B13C2R44	5.0894
HOOK2	JHU18278.B16C8R44	5.0544
YBX2	JHU14259.B11C2R48	5.0069
DLG3	JHU15594.B11C31R66	4.9895
NEDD4L	JHU13360.B12C21R28	4.9745
ATP5B	JHU07875.B8C1R36	4.9593
OCRL	JHU16017.B11C28R70	4.8817
SNRPA	JHU02190.B3C4R32	4.8384
TP53I3	JHU04981.B18C31R10	4.7353
RAD23A	JHU09187.B5C28R52	4.7309
ISOC2	JHU05040.B1C15R82	4.6535
FBXO2	JHU08293.B5C1R40	4.4859
CLC	JHU18987.B16C12R24	4.4539
PTPN23	JHU19428.B13C12R28	4.4447
ANXA10	JHU04900.B12C29R90	4.3957
PHOSPHO1	JHU19414.B14C3R28	4.3678
TLE3	JHU12337.B11C26R18	4.3672
PDE1B	JHU18211.B14C5R48	4.3364
RPSA	JHU15455.B11C22R62	4.2721
SRRT	JHU29258.B19C22R24	4.248
ZNF207	JHU12824.B12C22R24	4.2385
CLIC2	JHU00208.B1C4R6	4.144
MISP	JHU07495.B6C1R30	4.0583
GPBP1_frag	JHU02535.B4C6R38	4.046
ANXA6	JHU03948.B10C5R88	3.9964
SMAD4	JHU06509.B7C18R10	3.9879
BCL2	JHU13217.B12C6R30	3.8928
UNC5CL	JHU09212.B6C31R54	3.8902
PLD3	JHU07931.B8C6R36	3.7718
ATF7IP2	JHU16486.B11C14R80	3.7567
SNAP91	JHU07181.B13C14R80	3.7305
SRRT	JHU11715.B11C1R6	3.7154
CCDC89	JHU05581.B4C4R90	3.7032
ZNF701	JHU16803.B14C27R76	3.6337
ITCH	JHU14846.B9C30R50	3.5586
RPA3	JHU13284.B11C11R30	3.5321
RENBP	JHU18310.B14C11R88	3.4868
RPSA	JHU15365.B10C5R62	3.4388
Q5xjv5	JHU19920.B16C26R10	3.39
CERS6	JHU29293.B17C29R20	3.3738
AKR7A2	JHU09221.B7C26R56	3.3684
AK7	JHU07490.B5C25R28	3.3244
RSG1	JHU02795.B4C8R44	3.3222
EPN1	JHU12367.B12C8R18	3.3128
TCEA3	JHU06225.B8C23R8	3.3119
PTP4A2	JHU07268.B13C6R68	3.2987
LMNA	JHU08879.B13C26R74	3.2191
GORASP2	JHU04352.B2C17R70	3.2052
RAD23A	JHU16026.B9C31R68	3.1923
ARHGEF28	JHU25499.B20C11R4	3.1828
CARD9	JHU16068.B12C20R74	3.175
DUSP15	JHU12281.B11C20R14	3.1537
NUDT3	JHU14134.B12C13R40	3.1506
ANXA4	JHU03463.B1C26R58	3.1286
GOLPH3	JHU12760.B12C30R86	3.115
RPSA	JHU05929.B6C17R2	3.1143
MAPK7	JHU08694.B5C11R44	3.108
TXNRD1	JHU14255.B11C23R48	3.0915
TCL1A	JHU04883.B15C16R8	3.0862
RNF40_frag	JHU11518.B8C28R88	3.059
WBP11	JHU02590.B13C2R14	3.0394
SFN	JHU05260.B1C25R82	3.0279
FGFRL1	JHU18267.B16C22R48	3.0141
OBFC1	JHU09466.B8C24R56	2.9978
